# Supplementary material
Source: PubMed Central journal article supplement (PMC4530082)

**Cysteine oxidation impairs systemic glucocorticoid responsiveness in children with  
difficult-to-treat asthma**

**ONLINE REPOSITORY**

Susan T. Stephenson, Ph.D.<sup>1</sup>

Lou Ann S. Brown, Ph.D.<sup>1,2</sup>

My N. Helms, Ph.D.<sup>1,2</sup>

Hongyan Qu, M.S.<sup>1</sup>

Sheena D. Brown, Ph.D.<sup>1</sup>

Milton R. Brown, Ph.D.<sup>1,2</sup>

Anne M. Fitzpatrick, Ph.D.<sup>1,2</sup>

<sup>1</sup> Emory University Department of Pediatrics, Atlanta, GA

<sup>2</sup> Children's Healthcare of Atlanta Center for Cystic Fibrosis and Airways Disease Research

This study was funded by RO1 NR012021

and was supported in part by the National Center for Advancing Translational Sciences of the  
National Institutes of Health, award number UL1 TR000454.

**Table E1.** Associations between tertiles of plasma cysteine/cystine redox potentials<sup>1</sup> and clinical features in participants with difficult-to-treat asthma.

| Asthma feature                                        | Adjusted OR <sup>2</sup> (95% CI) | p-value |
|-------------------------------------------------------|-----------------------------------|---------|
| <b>Middle tertile (-61.30 to -30.40 mV)</b>           |                                   |         |
| High-dose inhaled glucocorticoids (previous 6 months) | 1.43 (0.46, 4.42)                 | 0.535   |
| Daily short-acting beta-agonists (previous 3 months)  | 2.26 (0.69, 7.38)                 | 0.177   |
| Asthma Control Questionnaire Score >1.5 <sup>3</sup>  | 1.81 (0.46, 7.05)                 | 0.394   |
| ≥ 3 oral corticosteroid bursts (previous year)        | 1.46 (0.49, 4.38)                 | 0.498   |
| Emergency department visit (previous year)            | 1.72 (0.55, 5.43)                 | 0.353   |
| Hospitalization for asthma (ever)                     | 1.27 (0.27, 5.96)                 | 0.761   |
| Intubation for asthma (ever)                          | 2.11 (0.53, 8.32)                 | 0.288   |
| Exhaled nitric oxide >35 ppb                          | 0.88 (0.28, 2.749)                | 0.822   |
| FEV <sub>1</sub> /FVC <80% of predicted value         | 0.79 (0.17, 3.74)                 | 0.768   |
| <b>Highest tertile (-30.41 to 54 mV)</b>              |                                   |         |
| High-dose inhaled glucocorticoids (previous 6 months) | 3.52 (1.05, 11.79)                | 0.041   |
| Daily short-acting beta-agonists (previous 3 months)  | 3.87 (1.19, 12.57)                | 0.024   |
| Asthma Control Questionnaire Score >1.5 <sup>3</sup>  | 4.13 (1.10, 15.46)                | 0.035   |
| ≥ 3 oral corticosteroid bursts (previous year)        | 1.04 (0.34, 3.15)                 | 0.951   |
| Emergency department visit (previous year)            | 9.29 (2.31, 37.35)                | 0.002   |
| Hospitalization for asthma (ever)                     | 2.17 (0.45, 10.37)                | 0.333   |
| Intubation for asthma (ever)                          | 4.55 (1.25, 16.60)                | 0.022   |
| Exhaled nitric oxide >35 ppb                          | 1.60 (0.53, 4.80)                 | 0.405   |
| FEV <sub>1</sub> /FVC <80% of predicted value         | 1.98 (0.51, 7.69)                 | 0.324   |

<sup>1</sup> The lowest tertile of the plasma cysteine/cystine redox potential (-99 to -61.29 mV) served as the reference group. A more positive redox potential reflects greater oxidation of the sample.

<sup>2</sup> Analyses were adjusted for race, sex, and BMI percentile.

<sup>3</sup> Scores on the Asthma Control Questionnaire range from 0 to 6, with lower scores indicating better asthma control.

**Table E2.** Features of the asthmatic participants at the baseline visit. Data represent the median (IQR) or the number of participants (%).

| Feature                                                                 | Did not receive triamcinolone<br>N = 42 | Received triamcinolone <sup>1</sup><br>N = 57 | p-value |
|-------------------------------------------------------------------------|-----------------------------------------|-----------------------------------------------|---------|
| Age (years)                                                             | 12 (10, 15)                             | 12 (10, 15)                                   | 0.773   |
| Sex                                                                     |                                         |                                               | 0.010   |
| Male                                                                    | 22 (52)                                 | 44 (77)                                       |         |
| Female                                                                  | 20 (48)                                 | 13 (23)                                       |         |
| Race                                                                    |                                         |                                               | < 0.001 |
| White                                                                   | 14 (33)                                 | 2 (4)                                         |         |
| Black                                                                   | 26 (62)                                 | 43 (75)                                       |         |
| Asian                                                                   | 1 (2)                                   | 0                                             |         |
| More than one race                                                      | 1 (2)                                   | 12 (21)                                       |         |
| Body mass index                                                         |                                         |                                               | 0.660   |
| < 85 <sup>th</sup> percentile (normal weight)                           | 17 (41)                                 | 26 (46)                                       |         |
| 85 <sup>th</sup> to 95 <sup>th</sup> percentile (overweight)            | 13 (21)                                 | 13 (23)                                       |         |
| ≥ 95 <sup>th</sup> percentile (obese)                                   | 12 (29)                                 | 18 (32)                                       |         |
| Asthma Medications                                                      |                                         |                                               | < 0.001 |
| Inhaled corticosteroids                                                 | 28 (67)                                 | 57 (100)                                      |         |
| Montelukast                                                             | 14 (25)                                 | 43 (75)                                       | 0.009   |
| Self-reported allergic rhinitis                                         | 36 (86)                                 | 55 (97)                                       | 0.052   |
| Asthma Control Questionnaire Score <sup>2</sup>                         | 0.36 (0.14, 0.61)                       | 1.29 (0.57, 2.14)                             | < 0.001 |
| Pediatric Asthma Quality of Life Questionnaire total score <sup>3</sup> | 6.36 (5.71, 6.85)                       | 5.30 (4.28, 6.00)                             | < 0.001 |
| Serum IgE (kU/L) <sup>4</sup>                                           | 44 (20, 254)                            | 365 (126, 646)                                | < 0.001 |
| Exhaled nitric oxide (ppb) <sup>4</sup>                                 | 23 (12, 43)                             | 28 (19, 56)                                   | 0.121   |
| Baseline lung function                                                  |                                         |                                               |         |
| FVC (% predicted)                                                       | 107 (103, 117)                          | 100 (92, 114)                                 | 0.182   |
| FEV <sub>1</sub> (% predicted)                                          | 97 (88, 107)                            | 90 (75, 101)                                  | 0.044   |
| FEV <sub>1</sub> /FVC                                                   | 0.81 (0.77, 0.84)                       | 0.77 (0.69, 0.82)                             | 0.060   |
| FEV <sub>1</sub> /FVC (% predicted)                                     | 92 (88, 96)                             | 90 (80, 94)                                   | 0.124   |
| FEF <sub>25-75</sub> (% predicted)                                      | 79 (67, 91)                             | 67 (49, 77)                                   | 0.118   |

|                                     |                   |                   |       |
|-------------------------------------|-------------------|-------------------|-------|
| Post-bronchodilator lung function   |                   |                   |       |
| FVC (% predicted)                   | 110 (101, 118)    | 109 (99, 122)     | 0.930 |
| FEV <sub>1</sub> (% predicted)      | 108 (93, 114)     | 101 (93, 115)     | 0.770 |
| FEV <sub>1</sub> /FVC               | 0.87 (0.82, 0.88) | 0.83 (0.77, 0.87) | 0.339 |
| FEV <sub>1</sub> /FVC (% predicted) | 98 (93, 102)      | 96 (90, 100)      | 0.726 |
| FEF <sub>25-75</sub> (% predicted)  | 103 (87, 112)     | 90 (73, 107)      | 0.421 |

<sup>1</sup> Triamcinolone was administered at the completion of the baseline characterization visit to participants with symptomatic asthma despite moderate-to-high dose inhaled corticosteroid therapy.

<sup>2</sup> Scores on the Asthma Control Questionnaire range from 0 to 6, with lower scores indicating better asthma control.

<sup>3</sup> Scores on the Pediatric Asthma Quality of Life Questionnaire range from 0 to 7, with higher scores indicating better quality of life.

<sup>4</sup> Data were logarithmically transformed prior to statistical analyses.

## FIGURE LEGENDS

**Figure E1.** Flowchart of participant enrollment and inclusion in the study.

**Figure E2.** Plasma (A) cysteine and (B) cystine concentrations and (C) the cysteine/cystine redox potential ( $E_h$ ) in healthy control children, children with non-severe asthma and children with severe asthma. Cysteine and cystine data are presented as the mean  $\pm$  SEM and the cysteine/cystine  $E_h$  boxplots are shown with minimum and maximum values. Dots represent individual participants. Control: n = 15, non-severe asthma: n = 43, severe asthma: n = 56 for each panel. \*p < 0.05, \*\*p < 0.01

**Figure E3.** Peripheral blood mononuclear cell (A) glutathione disulfide (GSSG) concentrations, (B) reactive oxygen species (ROS) generation, and (C) *CCL3* and (D) *CXCL1* mRNA gene expression in healthy control children, children with non-severe asthma and children with severe asthma. GSSG and ROS data are presented as the mean  $\pm$  SEM and *CCL3* and *CXCL1* mRNA data are presented as boxplots with minimum and maximum values. Dots represent individual values. \*p < 0.05, \*\*p < 0.01

**Figure E4.** Stability of the plasma cysteine/cystine redox potential ( $E_h$ ) between the baseline and two-week follow-up visit in (A) healthy control children and (B) children with asthma who did not receive triamcinolone. Differences between the baseline and 2-week follow-up visits were not statistically significant.

**Figure E5.** Peripheral blood mononuclear cell (PBMC) mRNA expression of (A) *CCL3* and (B) *CXCL1* in healthy control children, children with asthma who did and did not respond to triamcinolone, and children with asthma who did not receive triamcinolone. Boxplots depict fold-change values relative to controls are shown with minimum and maximum values. Dots represent individual participants. \* $p < 0.05$ , \*\* $p < 0.01$

**Figure E6.** Extracellular cysteine/cystine redox potentials ( $E_h$ ), intracellular glutathione disulfide (GSSG) concentrations, and intracellular reactive oxygen species (ROS) generation in THP-1 monocytes (A-C, respectively) and human primary PBMCs (D-E, respectively) after exposure to extracellular oxidizing versus reduced conditions. Horizontal lines in panels A and D represent the median. Other data are shown as the mean  $\pm$  SEM.

**Figure E7.** Glucocorticoid receptor (GR) protein sulfhydryl (-SH) groups available for binding in (A) THP-1 monocytes and (B) human primary PBMCs after exposure to extracellular oxidizing versus reduced conditions, and (C) healthy control children and children with asthma. Data are shown as the mean  $\pm$  SEM and are normalized to total GR protein. Representative images from participants are provided in panel (D).

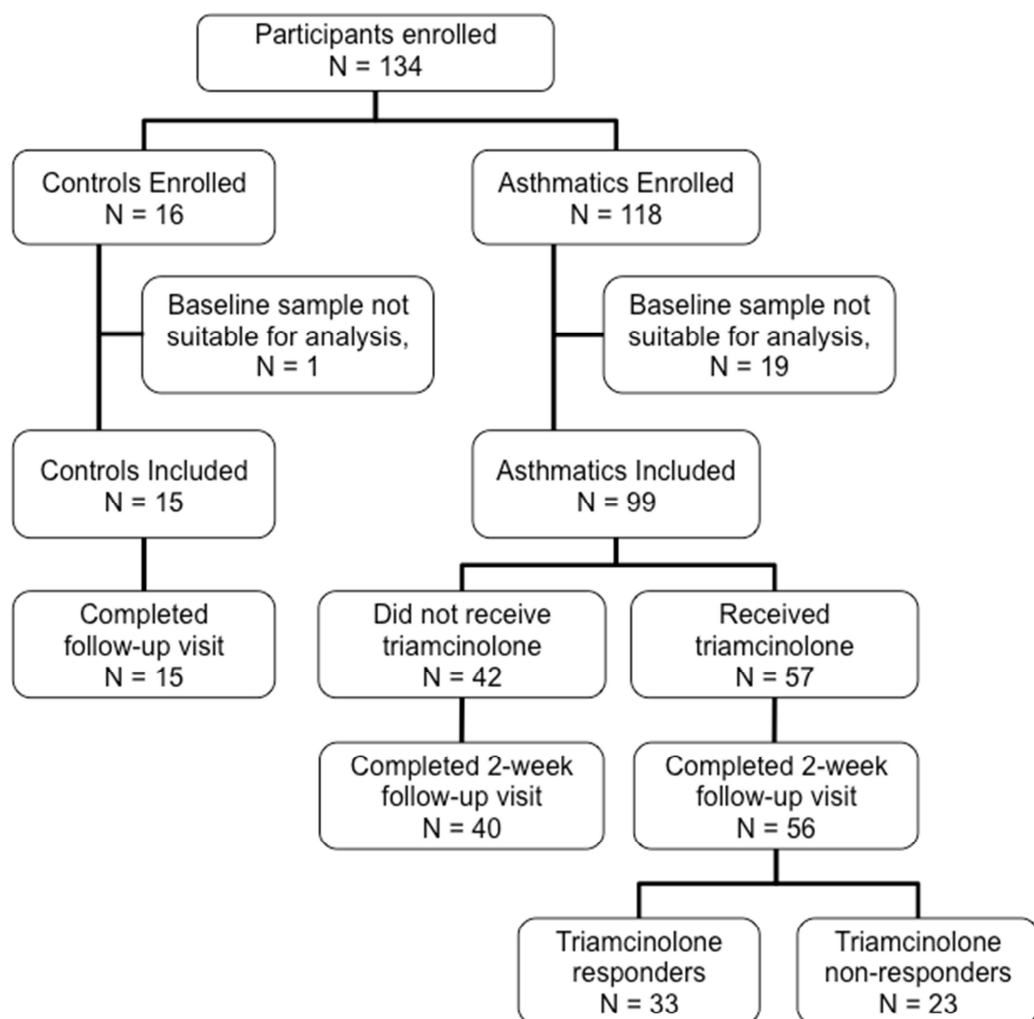



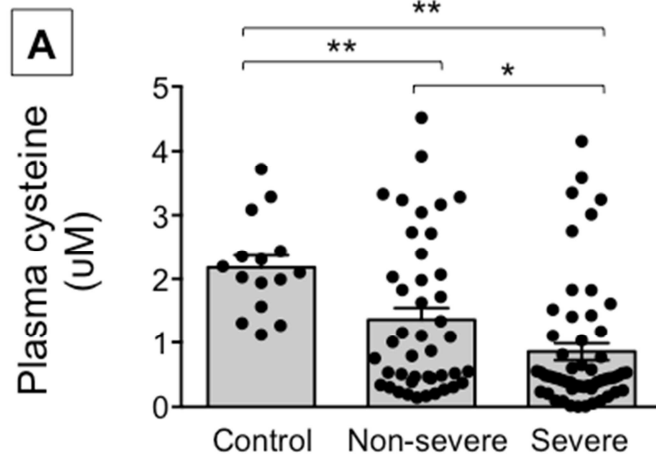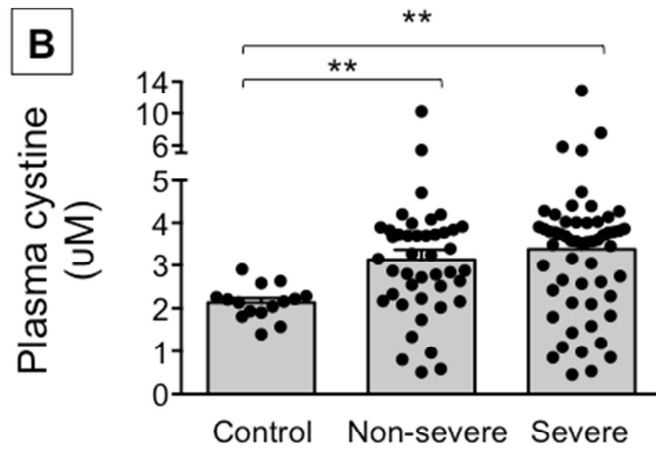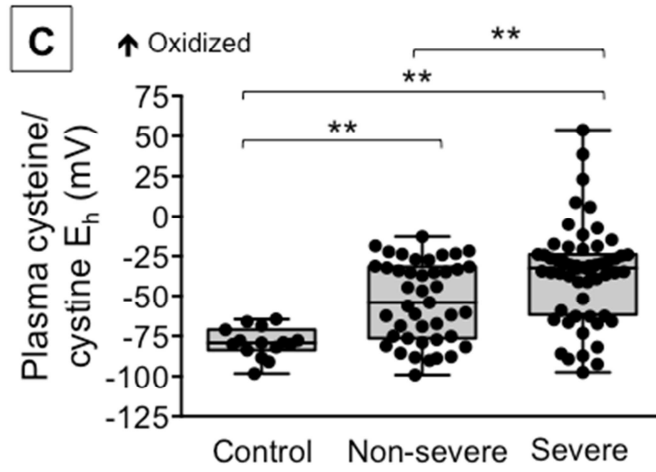

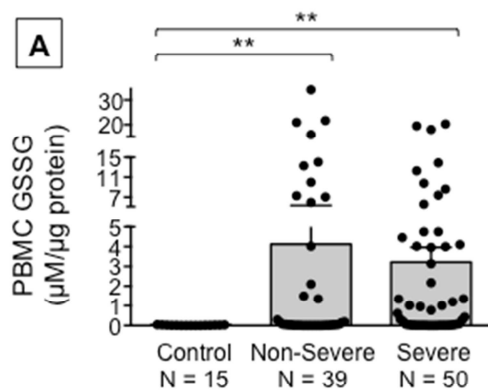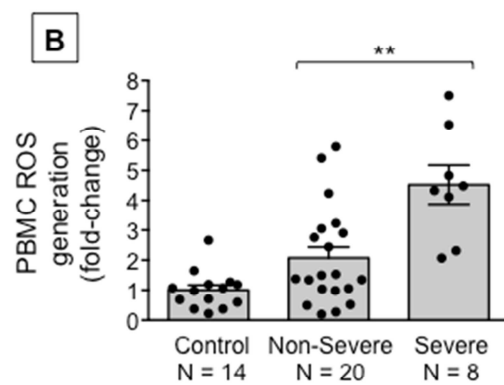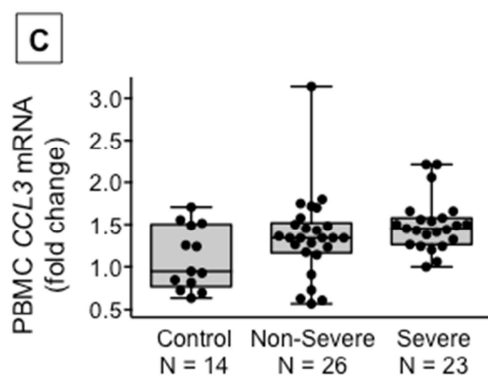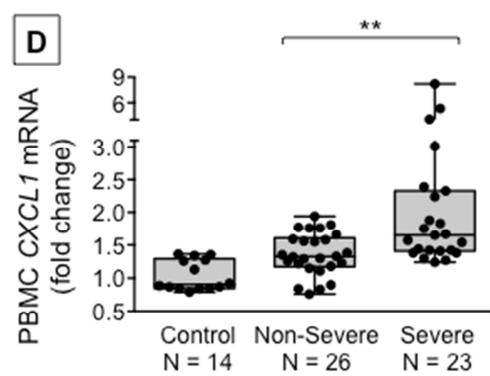

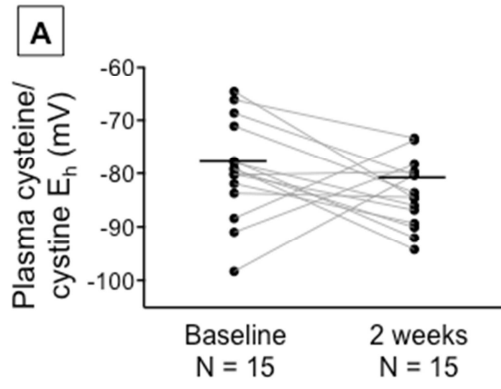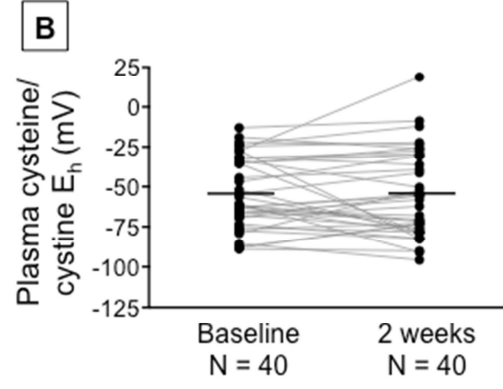

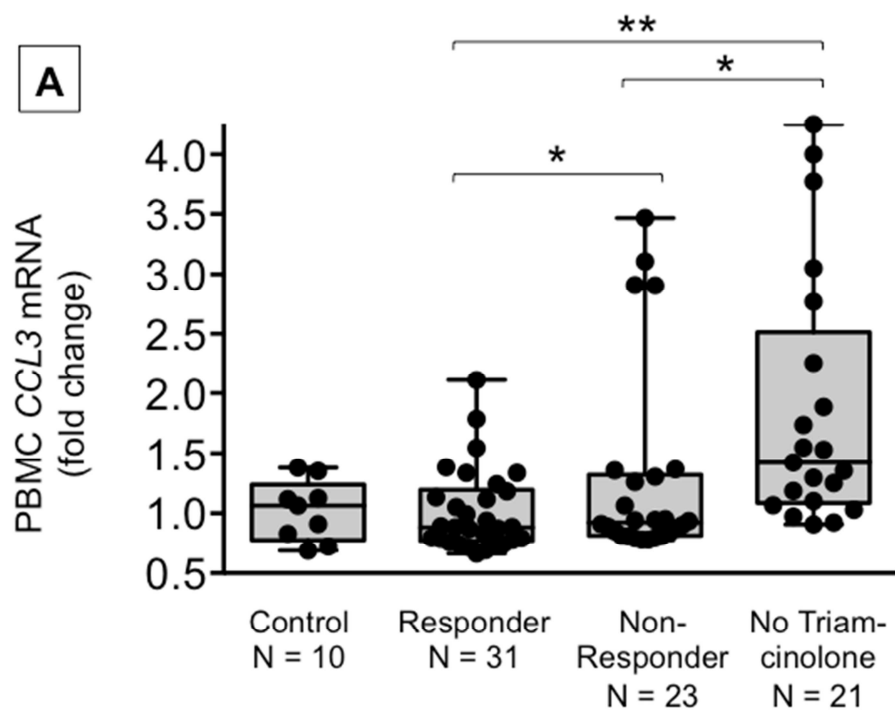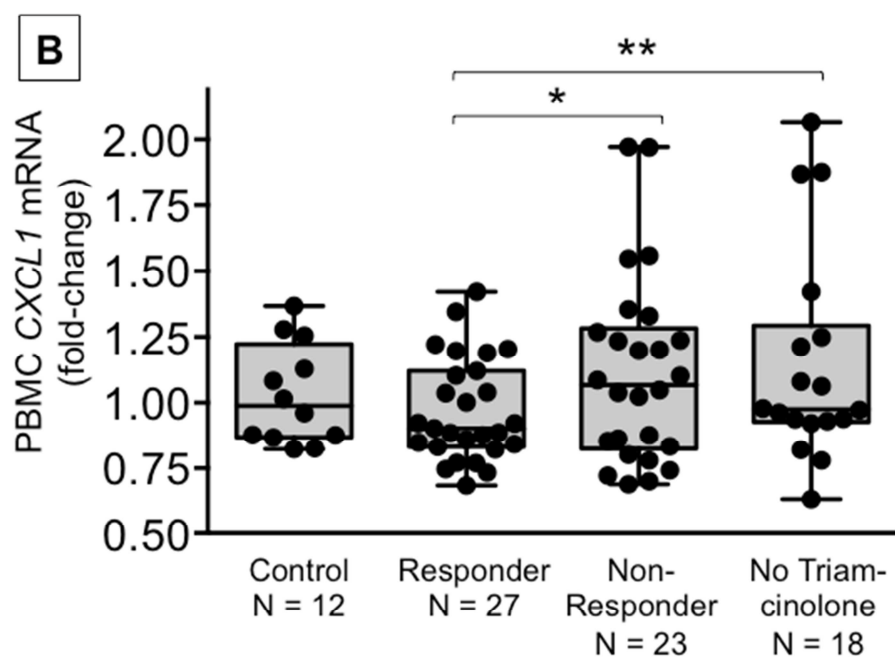

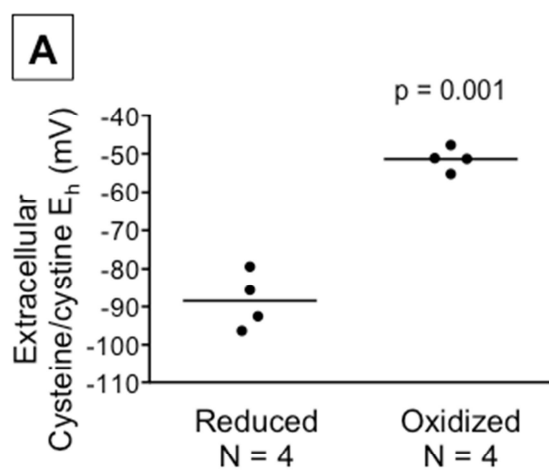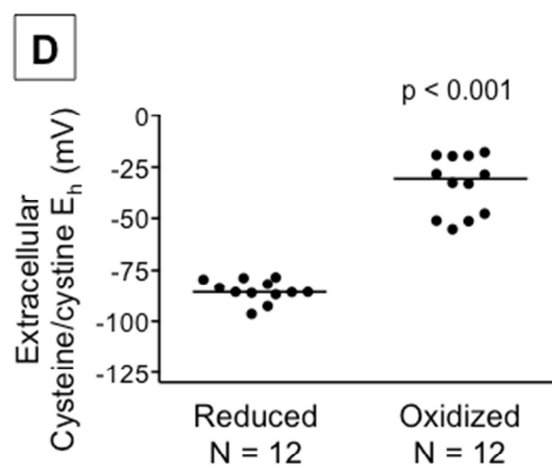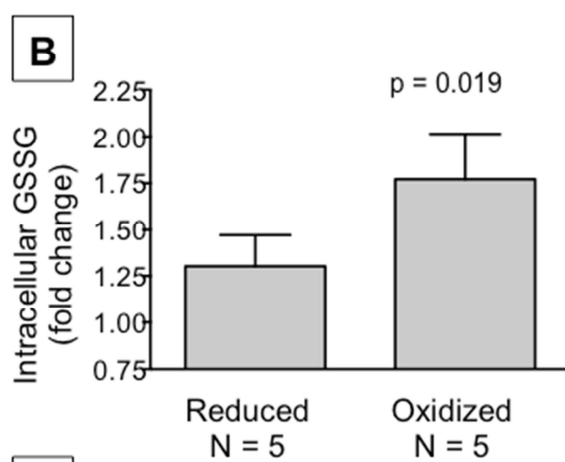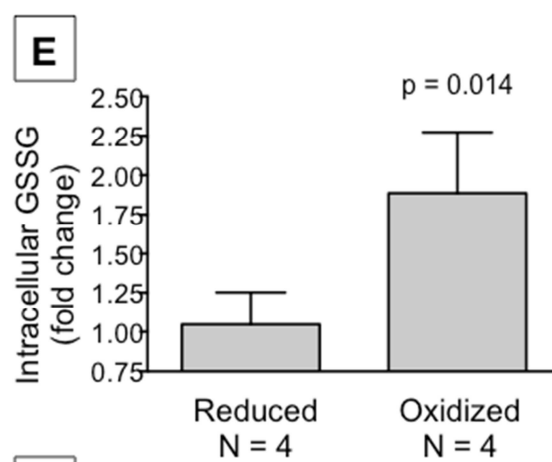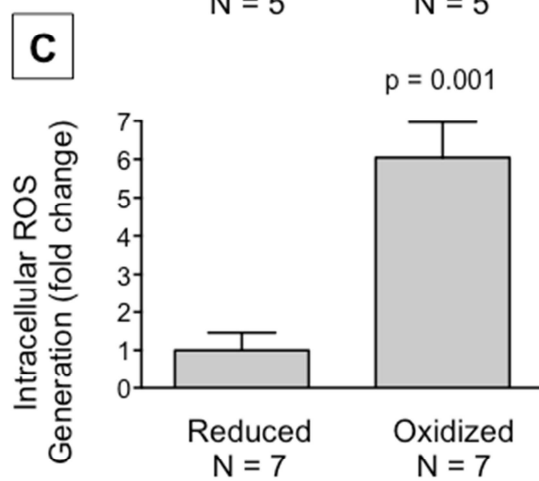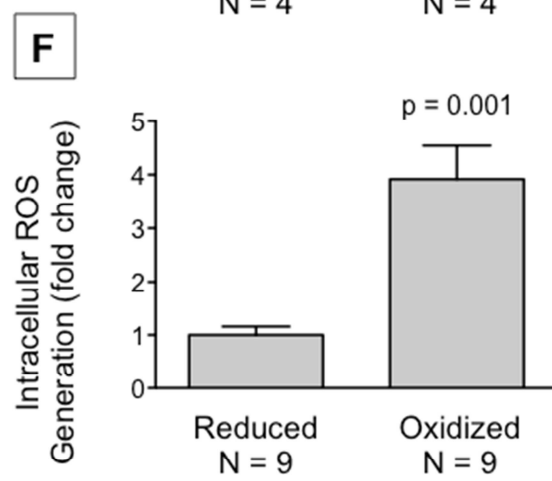

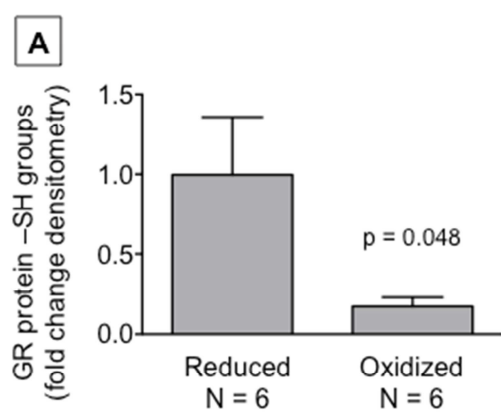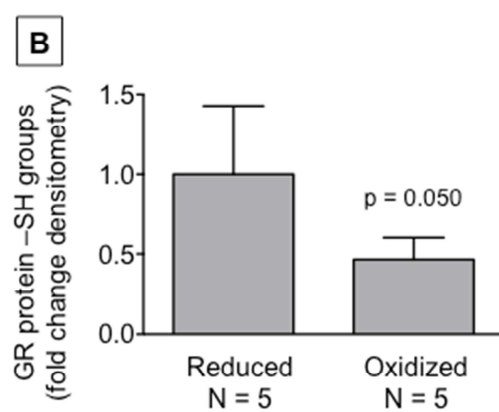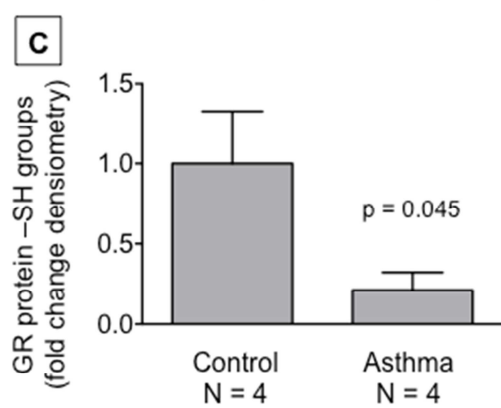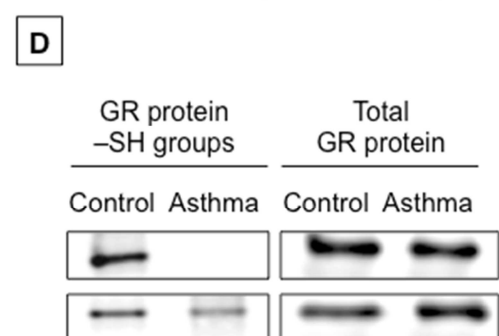

Supplement: NIHMS670156-supplement-01.pdf [file NIHMS670156-supplement-01.pdf]
